# Supplementary material for: Delineation of dew formation zones in Iran using long-term model simulations and cluster analysis
Source: Copernicus journal article supplement (doi:10.5194/hess-25-4719-2021), 2021-08-31
Supplement: Supplementary file 1 [file hess-25-4719-2021-supplement.pdf]

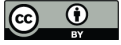

*Supplement of*

## **Delineation of dew formation zones in Iran using long-term model simulations and cluster analysis**

**Nahid Atashi et al.**

*Correspondence to:* Tareq Hussein ([tareq.hussein@helsinki.fi](mailto:tareq.hussein@helsinki.fi)) and Timo Vesala ([timo.vesala@helsinki.fi](mailto:timo.vesala@helsinki.fi))

The copyright of individual parts of the supplement might differ from the article licence.

## Supplementary Materials

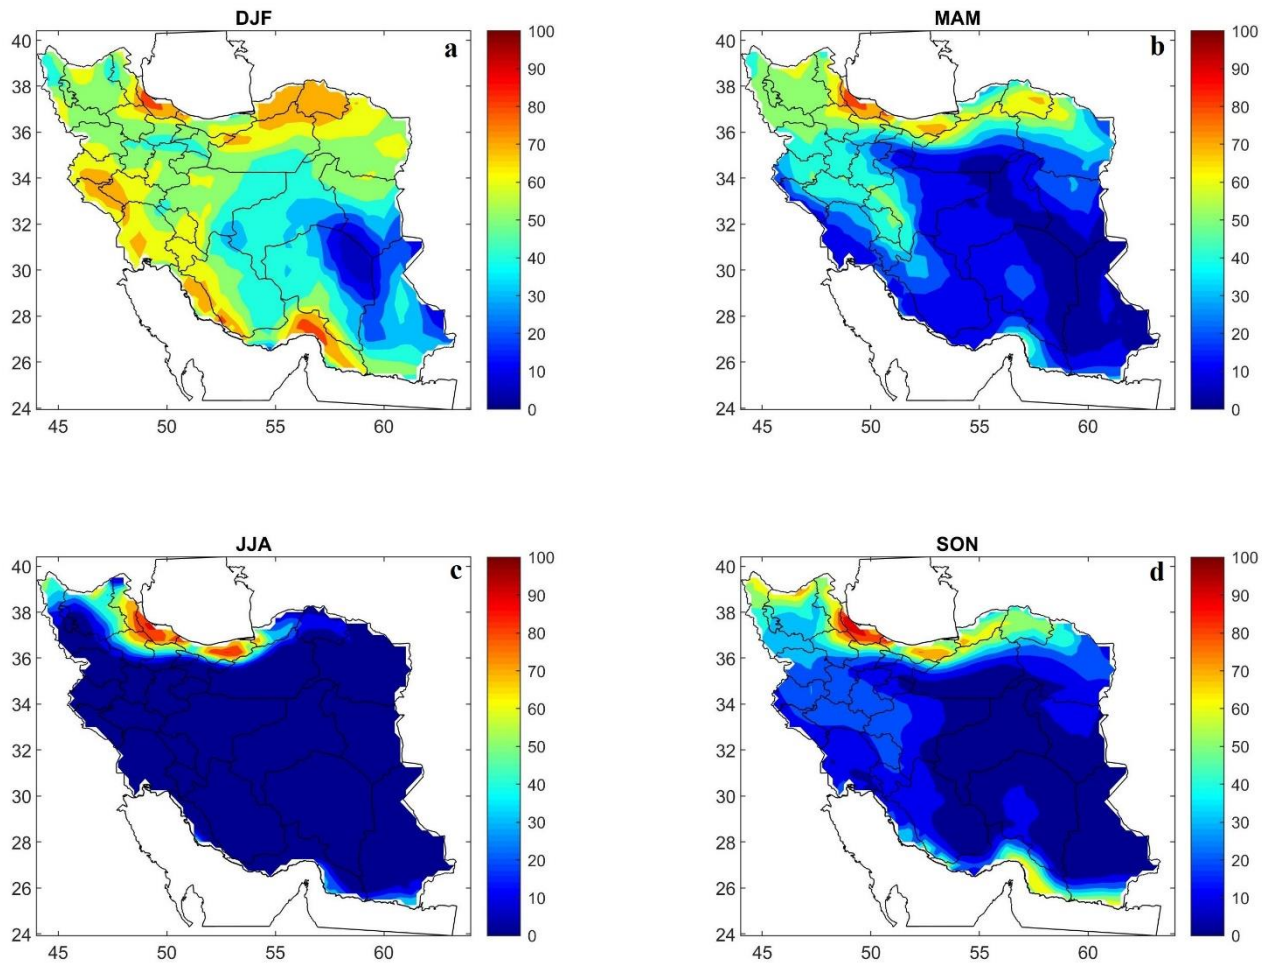

**Figure S1:** Overall seasonal occurrence of dew formation days (with a threshold of 0.1 mm/day) represented by the percentage of the days per season during 1979–2018. (a) winter (December, January, and February), (b) spring (March, April, and May), (c) summer (June, July, and August), and (d) autumn (September, October, and November).

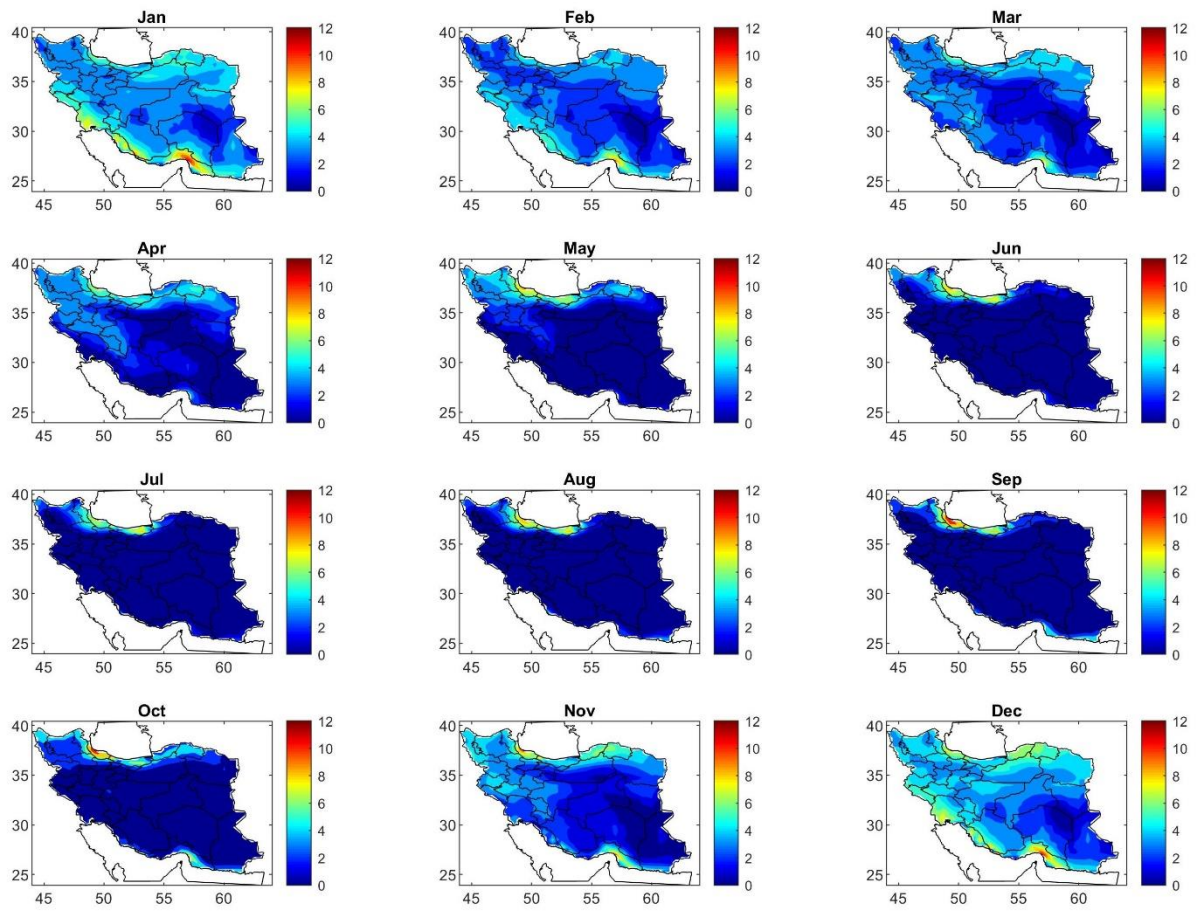

**Figure S2.** Cumulative dew yield [L/month] presented as an overall monthly mean during 1979–2018.
